# Supplementary material for: R132H IDH1 sensitizes glioma to the antiproliferative and cytotoxic effects of BET inhibition
Source: Research Square preprint supplement (doi:10.21203/rs.3.rs-1347349/v1), 2022-02-16
Supplement: Supplementary file 1 [file 0bec0575ab0df6e663d2f029.xlsx]

## Sheet: BETi
Antibody Target	Company	Catalog #	Species	Dilution
R132H IDH1	Millipore Sigma	MABC171	Ms	1:100
Cleaved Caspase-3 (Asp 175)	Cell Signaling Technology	9664	Rb	1:1000
phospho-ERK1/2 (T202/Y204)	Cell Signaling Technology	4370	Rb	1:1000
ERK1/2	Cell Signaling Technology	4695	Rb	1:1000
c-MYC	Cell Signaling Technology	5605	Rb	1:1000
phospho-PDGFRα (Y754)	Cell Signaling Technology	2992	Rb	1:1000
PDGFRα	Cell Signaling Technology	3174	Rb	1:1000
H3K14Ac	Cell Signaling Technology	7627	Rb	1:1000
H3K27Ac	Cell Signaling Technology	8173	Rb	1:1000
H3S10Ph	Cell Signaling Technology	d7n8e	Rb	1:1000
Histone H3	Cell Signaling Technology	4499	Rb	1:2000
GAPDH	Cell Signaling Technology	2118	Rb	1:1000
Goat anti-rabbit	Invitrogen	A16104	Goat	1:5000
Goat anti-mouse	Invitrogen	31430	Goat	1:10000
Tubulin	Cell Signaling Technology	2128	Rb	1:1000
phospho-mTOR (S2448)	Cell Signaling Technology	5536	Rb	1:1000
mTOR	Cell Signaling Technology	2983	Rb	1:1000
Rictor	Cell Signaling Technology	2114	Rb	1:1000
phospho-S6K1 (Thr389)	Cell Signaling Technology	9234	Rb	1:1000
